# Supplementary material
Source: PubMed Central journal article supplement (PMC7816106)
Supplement: jama-e2025864-s001.pdf [file jama-e2025864-s001.pdf]

## Online Supplement 1

1

2

3 This supplement contains the following items:

4

5 1. Final study protocol

6

7 2. Summary of changes in the study protocol

8

9

10

11  
12  
13  
14  
15  
16  
17  
18  
19  
20  
21  
22  
23  
24  
25  
26  
27  
28  
29  
30  
31  
32  
33  
34  
35  
36  
37  
38  
39  
40  
41  
42  
43  
44  
45  
46  
47  
48  
49  
50  
51  
52  
53  
54  
55

**CLINICAL TRIAL PROTOCOL**

**Suspension of angiotensin-converting enzyme inhibitors and angiotensin receptor blockers and adverse outcomes in hospitalized patients with severe acute respiratory syndrome coronavirus 2 (SARS-CoV-2) – The BRACE CORONA Trial**

**PROTOCOL NUMBER 001/2020**

Proponent: Instituto D’Or de Pesquisa e Ensino (IDOR)

Partner Institution: Brazilian Clinical Research Institute (BCRI)

56  
57  
58

**SYNOPSIS OF PROTOCOL NUMBER 001/2020**

**BRACE CORONA Trial**

|                          |                                                                                                                                                                                                                                                                                                                                                                                                         |
|--------------------------|---------------------------------------------------------------------------------------------------------------------------------------------------------------------------------------------------------------------------------------------------------------------------------------------------------------------------------------------------------------------------------------------------------|
| Study title              | Suspension of angiotensin-converting enzyme inhibitors and angiotensin receptor blockers and adverse outcomes in hospitalized patients with severe acute respiratory syndrome coronavirus 2 (SARS-CoV-2) – The BRACE CORONA Trial                                                                                                                                                                       |
| Proponent's Name         | Instituto D'Or de Pesquisa e Ensino (IDOR)                                                                                                                                                                                                                                                                                                                                                              |
| Partner Institutions     | Brazilian Clinical Research Institute (BCRI)                                                                                                                                                                                                                                                                                                                                                            |
| Responsible Researchers  | André Feldman<br>Andréa Silvestre de Sousa<br>Ariane Macedo<br>Guilherme Arruda<br>Olga Ferreira de Souza<br>Pedro Gabriel Melo de Barros e Silva<br>Renata Moll Bernardes<br>Renato D. Lopes (Principal investigator)                                                                                                                                                                                  |
| Study Design and Methods | Patients treated in emergency departments of the D'Or São Luiz network hospitals with a diagnosis of COVID-19.<br>Randomization 1:1: Group 1 will continue to use angiotensin-converting enzyme inhibitors (ACEI) and angiotensin receptor blockers (ARBs); group 2 will discontinue the use of ACEI and ARBs.                                                                                          |
| Primary Objective        | To assess the impact of the discontinuation of ACEI and ARB therapy on days alive and out of the hospital in patients hospitalized with COVID-19.                                                                                                                                                                                                                                                       |
| Inclusion Criteria       | <ul style="list-style-type: none"> <li>• Hospitalized patients with confirmed COVID-19 diagnosis, using ACEI or ARBs;</li> <li>• Age ≥18 years;</li> <li>• Using no more than 3 antihypertensive drugs;</li> <li>• Ability of patient (or legal representative) to provide informed consent</li> </ul>                                                                                                  |
| Exclusion Criteria       | <ul style="list-style-type: none"> <li>• Patients hospitalized for decompensated congestive heart failure in the last 12 months;</li> <li>• Use of sacubitril/valsartan;</li> <li>• Use of mechanical ventilation, and/or hemodynamic instability in the first 24 hours or until confirmation of COVID-19 diagnosis;</li> <li>• Acute renal failure;</li> <li>• Shock;</li> <li>• Pregnancy.</li> </ul> |
| Sample size              | Approximately 700 patients                                                                                                                                                                                                                                                                                                                                                                              |
| Participating sites      | D'Or São Luiz Network Hospitals and field hospitals managed by D'Or São Luiz Network                                                                                                                                                                                                                                                                                                                    |
| Follow-up                | 30 days after randomization                                                                                                                                                                                                                                                                                                                                                                             |

59  
60  
61

62 **List of Acronyms and Abbreviations:**

63 TIA: transient ischemic attack

64 COVID-19: coronavirus disease 2019

65 CVA: cerebrovascular accident

66 ARB: angiotensin receptor blocker

67 CVD: cardiovascular disease

68 AE: adverse event

69 SAE: serious adverse event

70 ACE-2: angiotensin-converting enzyme 2

71 ICH: International Council for Harmonisation

72 ACEI: angiotensin-converting enzyme inhibitors

73 SARS-CoV-2: severe acute respiratory syndrome coronavirus 2

74

75

76

77

78

79

80

81

82

83

84

85

86

87

88

89

90

91

92

93

94

95

96

97

98

99 **Table of Contents**

|     |                                      |    |
|-----|--------------------------------------|----|
| 100 | Introduction.....                    | 7  |
| 101 | Objective.....                       | 8  |
| 102 | Primary Objective                    | 8  |
| 103 | Methodology.....                     | 9  |
| 104 | Study Design                         | 9  |
| 105 | Randomization Process                | 9  |
| 106 | Risks and Benefits .....             | 9  |
| 107 | Eligibility .....                    | 10 |
| 108 | Inclusion Criteria                   | 10 |
| 109 | Exclusion Criteria                   | 10 |
| 110 | Study Procedures.....                | 11 |
| 111 | Outcomes of Interest .....           | 11 |
| 112 | Primary Outcomes                     | 11 |
| 113 | Secondary Outcomes                   | 11 |
| 114 | Safety Analysis .....                | 12 |
| 115 | Data and Safety Monitoring Committee | 12 |
| 116 | Severe Adverse Events                | 12 |
| 117 | Statistical Analysis .....           | 12 |
| 118 | Sample Size                          | 12 |
| 119 | Statistical Analysis Plan            | 13 |
| 120 | Ethical and Legal Aspects.....       | 13 |
| 121 | Participant confidentiality          | 14 |
| 122 | References .....                     | 15 |
| 123 |                                      |    |
| 124 |                                      |    |

125 **Introduction**

126 Severe acute respiratory syndrome coronavirus 2 (SARS-CoV-2), the virus responsible for the  
127 coronavirus disease 2019 (COVID-19) pandemic, was first detected in Wuhan, China in December 2019.  
128 Due to the rapid spread of the virus to more than 100 countries, COVID-19 was declared a pandemic by  
129 the World Health Organization on March 11, 2020 (WHO, 2020).

130  
131 Clinical presentation of COVID-19 is variable and most patients are asymptomatic or present with mild  
132 symptoms commonly seen with other viral infections such as cough, fever, dyspnea, myalgia, fatigue, and  
133 diarrhea. Abnormal laboratory values such as lymphocytopenia in patients with COVID-19 are not unique  
134 and are commonly found with other viruses. The most severe cases of COVID-19 may present as  
135 pneumonia and acute respiratory distress syndrome and may evolve to multiple organ failure and death  
136 (Chen et al., 2020; Huang et al., 2020; Wang et al., 2020). Children may be less susceptible to severe  
137 forms of the disease, possibly due to superior immunity and the absence of comorbidities. A difference in  
138 the maturation of the viral receptors also may be associated with the lower risk in children (Wang et al.,  
139 2020; Wu et al., 2020).

140  
141 Data now show that the infection has a direct impact on the cardiovascular system (Lippi et al., 2020).  
142 Those with pre-existing cardiovascular disease (CVD) may be more susceptible to COVID-19. Elderly  
143 patients or those previous CVD have a higher risk of developing severe forms of the disease and have  
144 higher mortality (Ruan et al., 2020).

145  
146 In patients with COVID-19 the incidence of cardiovascular symptoms is high due to the systemic  
147 inflammatory response and immune system disorders during the progression of the disease (Zheng et al.,  
148 2020). The infection is associated with myocardial ischemia, myocarditis, arrhythmias, and  
149 thromboembolic events. Studies suggest the involvement of the angiotensin-converting enzyme 2 (ACE-  
150 2) in the pathophysiology of the coronavirus infection. This enzyme is a membrane-bound  
151 aminopeptidase that has a vital role in the cardiovascular and immune systems and is related to the  
152 development of hypertension and diabetes mellitus. SARS-CoV-2, like other coronaviruses, uses ACE-2  
153 as a functional receptor to enter the cells (Turner et al., 2004). The presence of ACE-2 in alveolar cells  
154 makes the lungs a preferred entry site for the virus. ACE-2 also plays a role in pulmonary protection, so  
155 the binding of the virus to the receptor may interfere with this protective effect thereby contributing to the  
156 virus' pathogenicity.

157  
158 Angiotensin-converting enzyme inhibitors (ACEI) and angiotensin receptor blockers (ARBs) are widely  
159 used in patients with cardiovascular diseases such as arterial hypertension, coronary disease, and  
160 congestive heart failure.

161

162 Although some experimental studies in animal models report an association between the use of ACEI and  
163 ARB and an increase in ACE-2 levels, there is currently no definitive evidence regarding the association  
164 between the use of these drugs and an increased risk of SARS-CoV-2 infection. The Brazilian, American,  
165 and European Cardiology Societies (SBC, ACC, AHA, and ESC) recommend the continued use of these  
166 drugs in patients with heart failure, hypertension, and ischemic heart disease. If a patient with  
167 cardiovascular disease is diagnosed with COVID-19, decisions regarding treatment must be made on a  
168 case-by-case basis weighing the risk of stopping these drugs versus the potential risk of complications of  
169 COVID-19. Urgent new studies are needed, properly delineated and conducted, so these  
170 recommendations can be updated with a higher degree of certainty about the safety of continuing or  
171 discontinuing these drugs in the presence of COVID-19.

172  
173 Treatments investigated for COVID-19 may have adverse cardiovascular effects. Preliminary studies  
174 suggest the use of chloroquine or hydroxychloroquine, drugs that may inhibit in vitro SAR-CoV-2 infection  
175 (Liu et al., 2020), may cause hypotension, vasodilation, suppression of myocardial function, and cardiac  
176 arrhythmias. Patients with COVID-19 with previous cardiovascular disease or cardiac decompensation,  
177 particularly those taking hydroxychloroquine, should be monitored using echocardiography or  
178 electrocardiography and biomarkers such as troponin and D-dimer (Lippi et al., 2020).

179  
180 The independent effect of chronic treatments like ACEI and ARBs on outcomes in patients with COVID-  
181 19 is unknown. In addition, there is conflicting observational evidence about the potential impact of  
182 ACEIs/ARBs on patients with COVID-19 (Gheblawi et al., 2020; Soler et al., 2008; Patel et al., 2020). On  
183 one hand, ACEI and ARB use could increase ACE2 receptor expression and thus enhance viral binding  
184 and viral entry leading to worse outcomes in patients with COVID-19. On the other hand, diminishing  
185 production of angiotensin II with an ACEI or ARB enhances the generation of angiotensin (1–7), which  
186 attenuates inflammation and fibrosis and therefore could attenuate lung injury. Given the frequent use of  
187 these agents worldwide, randomized clinical trial evidence is urgently needed to guide the management  
188 of patients with COVID-19.

## 189 **Objective**

### 191 **Primary Objective**

192 To assess the impact of the discontinuation of ACEI and ARB therapy on days alive and out of the  
193 hospital in patients hospitalized with COVID-19.

194



## 195 **Methodology**

### 196 **Study Design**

197 Patients treated in the emergency departments of the hospitals in the D'Or São Luiz network with a  
198 suspected diagnosis of COVID-19 will be included in an observational registry. Data will be collected for  
199 the purposes of epidemiological surveillance, healthcare management, and to learn more about COVID-  
200 19 in clinical practice. Patients with a confirmed diagnosis of COVID-19 who are using ACEI and/or ARBs  
201 will be invited to participate in the proposed trial. After meeting eligibility criteria and providing informed  
202 consent, patients be randomized in a 1:1 ratio to either continue ACEI/ARB therapy (Group 1) or  
203 discontinue ACEI/ARB (Group 2) for 30 days.

204

205 The use of other anti-hypertensive drugs will be determined by the clinical team caring for the patient. A  
206 sampling of 500 patients will be made, stratified by drug that the patient is taking at randomization (ACEI  
207 or ARB). All decisions about procedures and treatments during hospitalization will be made by the  
208 medical team according to current guidelines and in the best interest of the patient. The only study  
209 intervention will be the continuation or discontinuation or ACEI and/or ARB therapy.

210

211 The study team will recommend substitutions for ACEI/ARB therapy, if deemed necessary, following  
212 recommendations from the Brazilian Guideline of Arterial Hypertension. The participant will be assisted by  
213 the medical team during the follow-up of the proposed study and, if necessary, the need for reintroduction  
214 of the drug previously used (ACEI or ARB) will be assessed.

215

216 Thirty days after randomization the patient will be reassessed, or in case of discharge, telephone contact  
217 will be made to evaluate the status of the patient. The outcomes reported by the investigators from each  
218 hospital will be verified by the IDOR research team.

219

### 220 **Randomization Process**

221 Randomization will be done in 1:1 ratio and will be made using an electronic web-based system.

222

### 223 **Risks and Benefits**

224 Available information indicates that an increase in ACE-2 expression may increase the virus binding;  
225 however, there are also studies that indicate that an increase in ACE-2 expression may be protective.  
226 Therefore, there may be a balance between risk and benefit (equipoise) with the continuation or  
227 discontinuation of ACEI/ARB in patients with COVID-19. Observational data have not been clear about  
228 the potential impact of ACEIs/ARBs on patients with COVID-19. The lack of clear guidance on how to  
229 manage these agents in patients with COVID-19 has generated confusion among physicians leading to

230 heterogeneous clinical practices around the world. The risk of routinely stopping ACEI/ARB in COVID-19  
231 is not known. This risk might be particularly high given that patients with cardiovascular diseases  
232 (hypertension, heart failure) are at high risk for developing severe COVID-19. Therefore, between the  
233 balance of risk and benefit of discontinuing ACEI/ARBs, the patients eligible for the study will be those  
234 with less dependency on ACEI/ARBs, such as hypertensive patients who have other treatment  
235 alternatives (use of <4 anti-hypertensive drugs) and heart failure patients with no decompensation in the  
236 last 12 months. In patients with heart failure, there will be the option to use treatment alternatives, such as  
237 hydralazine and nitrate, which are commonly used in place of ACEI/ARB, especially during  
238 hospitalizations. During the course of the study, a security committee coordinated by BCRI will assess  
239 efficacy and safety outcomes.

240  
241 Finally, in the context of a global pandemic, the information generated by this trial could benefit a great  
242 number of individuals. The availability of data on best practices in patients using ACEI/ARBs will inform  
243 clinical practice in the treatment of this high-risk population with cardiovascular comorbidities infected with  
244 COVID-19.

245

## 246 **Eligibility**

### 247 **Inclusion Criteria**

- 248 • Hospitalized patients with confirmed COVID-19 diagnosis, using ACEI or ARBs;
- 249 • Age  $\geq 18$  years;
- 250 • Maximum use of 3 anti-hypertensive drugs;
- 251 • Patient (or legal representative) able to give informed consent in accordance with ICH Good  
252 Clinical Practice guidelines and local legislation and/or regulations.

253

### 254 **Exclusion Criteria**

- 255 • Patients hospitalized for decompensated congestive heart failure in the last 12 months;
- 256 • Use of sacubitril/valsartan;
- 257 • Use of mechanical ventilation and/or hemodynamic instability in the first 24 hours or until the  
258 moment of confirmation of the COVID-19 diagnosis;
- 259 • Acute renal failure;
- 260 • Shock;
- 261 • Pregnancy.

262

263 **Study Procedures**

264

| Procedures                                            | Screening Visit | Randomization Visit | 30-Day Visit or Telephone Call |
|-------------------------------------------------------|-----------------|---------------------|--------------------------------|
| Confirmation of Inclusion/Exclusion criteria          | x               |                     |                                |
| Informed consent form signature                       | x               |                     |                                |
| Clinical assessment                                   | x               | x                   | (x)*                           |
| Demographic data/Medical history                      | x               |                     |                                |
| COVID-19 diagnosis confirmation                       |                 | x                   |                                |
| Severity assessment and patient eligibility           |                 | x                   |                                |
| Outcome assessment                                    |                 |                     | x                              |
| Verification of adverse events/Serious adverse events |                 |                     | x                              |

265 \*If patient is still hospitalized

266

267

268 **Outcomes of Interest**

269 **Primary Outcomes**

270 Days alive and out of the hospital will be separately calculated for each included patient and will be  
271 calculated from the day of randomization until the 30<sup>th</sup> day post-randomization. Days alive and out of the  
272 hospital represents the follow-up time (30 days) subtracted from the days in the hospital and/or the days  
273 between death and completion of follow-up.

274

275 **Secondary Outcomes**

276 Cardiovascular and non-cardiovascular outcomes such as progression of COVID-19, mortality (overall  
277 and cardiovascular), acute myocardial infarction, CVA/TIA, new heart failure or worsening of pre-existing  
278 heart failure, myocarditis, pericarditis, arrhythmias requiring treatment, thromboembolic events,  
279 hypertensive crisis, respiratory insufficiency, hemodynamic decompensation, sepsis, renal failure, and  
280 biomarkers levels (troponin, B-type natriuretic peptide [BNP], N-terminal pro B-type natriuretic peptide  
281 [NT-proBNP], D-dimer, total lymphocytes, CD4, CD8, macrophages, cytokines, in addition to proteomics  
282 and metabolomics diagnosed biomarkers) will also be assessed.

283

284 The clinical outcomes during 30-day follow-up (death, acute myocardial infarction, CVA, hypertensive  
285 crisis, and heart failure) will be assessed and classified by an adjudication committee.

286

## 287 **Safety Analysis**

### 288 **Data and Safety Monitoring Committee**

289 The study outcomes (which include efficacy and safety variables) and other serious adverse events not  
290 covered by the study outcomes will be reported and monitored continuously by an independent data and  
291 safety monitoring committee (DSMC). The DSMC will be managed by the BCRI and will comprise  
292 independent investigators who will analyze the data in an unblinded and systematic way with weekly  
293 meetings in order to offer greater security to the patients. In addition to the weekly regular analyses, 2  
294 interim formal analyses will be performed (with 150 randomized patients and 250 randomized patients  
295 who have completed the study follow-up of 30 days). The DSMC will use a P value  $<0.001$  to determine a  
296 statistically significant difference of the outcomes between the groups of these interim analyses (in the  
297 final study analysis, a P value of  $<0.05$  will be used to determine a statistically significant difference).

298

### 299 **Severe Adverse Events**

300 A severe adverse event (AE) is any adverse event that meets at least one of the following criteria:

- 301 • Fatal (AE that causes or leads to death);
- 302 • Risk to life (puts the patient at imminent risk of death);
- 303 • Requires or extends hospitalization;
- 304 • Results in deficiency/incapacity;
- 305 • Significant medical event that may require clinical or surgical intervention in order to prevent one  
306 of the outcomes listed above.

307

## 308 **Statistical Analysis**

### 309 **Sample Size**

310 As there are no studies that allow adequate sample size calculation. Thus, the initial sample size was 500  
311 patients, with possible alteration according to recruitment, event rate, and DSMC interim analysis.

312

313 Using data from the ongoing study COALIZAO I [NCT04322123] as a reference (standard deviation of 4  
314 days and average time of 24 days alive and outside the hospital), it will be possible to obtain a power of  
315 90% to detect an average ratio of at least 1.10 in the primary endpoint with a total of 500 patients.

316

317 The recruitment of participants occurred faster than expected and in order to be able to carry out the two  
318 interim analyzes with a 30-day follow-up of 150 and 250 patients, the recruitment was extended and the  
319 sample size increased to approximately 700 patients. Due to a lower number of patients using ACEI in  
320 relation to the subgroup of patients using ARBs, we intend, after inclusion of patients in the principal study  
321 is completed, to follow with the randomization only of the ACEI patients subgroup until we reach an

322 estimated sample of 250 patients. The aim is to achieve better statistical power in order to perform a pre-  
323 specified subgroup analysis. Patients included will be those treated in the emergency departments of  
324 D'Or São Luiz network hospitals with a confirmed diagnosis of COVID-19 who meet the previously  
325 described inclusion criteria during a period of 3 months; the recruitment period can be extended  
326 depending on rate of recruitment.

327

### 328 **Statistical Analysis Plan**

329 Continuous variables will be described as median (25th, 75th percentiles) or mean  $\pm$  standard deviation  
330 according to the distribution. Means will be compared using the t test and medians will be compared  
331 using the Kruskal-Wallis test. Categorical variables will be described by absolute and relative frequencies  
332 and the proportions will be compared using the Chi-square test. P values will be two-sided and a P value  
333  $<0.05$  will be considered statistically significant. All analyses will be performed using R version 3.6.1.

334

335 As the primary outcome will be measured as days alive or out of the hospital, the analysis will be based  
336 on mean and median of this outcome as well as mean ratio and difference in means and medians. The  
337 analysis of the distribution of days alive and out of the hospital over 30 days will be performed by  
338 histograms in the 2 groups (with and without suspension of ACEI / ARB) and the median and 25th and  
339 75th percentiles of the general population and of each group will be calculated. The comparison between  
340 the groups will be made using a Quasi-Poisson model. Results will be presented as average ratios  
341 between the groups with the respective 95% confidence interval. A sensitivity analysis will also be  
342 performed in which patients who have died (even if death occurred after discharge) will be considered as  
343 having zero days alive outside the hospital. Interaction tests will be performed for specific subgroups that  
344 include sex (male or female); age ( $>$  or  $\leq 65$  years); symptom days (in tertiles); history of acute myocardial  
345 infarction (vs. no); history of stroke (vs. no), history of heart failure (vs. no); history of hypertension (vs.  
346 no); use of ACEI vs. use of ARB and ACE or ARB times before inclusion.

347

348 Secondary outcomes over 30 days such as mortality and cardiovascular events will be compared using  
349 log-binomial models and relative risks will be reported, with the respective 95% confidence intervals.

350

351

### 352 **Ethical and Legal Aspects**

353 This clinical study was designed and should be implemented and reported in accordance with the  
354 International Conference on Harmonization Conference (ICH) guidelines for Good Clinical Practice, with  
355 applicable local standards, and with the ethical principles outlined in the Declaration of Helsinki.

356 Patients will be invited to participate voluntarily in the study and if they accept, they will sign the free and  
357 informed consent term previously approved by the National Research Ethics Commission (CONEP), in

358 two copies, one of which will be delivered to the participant and the other will be filed by research center  
359 staff.

360

361 **Participant confidentiality**

362 All participants will be identified by a number, maintaining the confidentiality of all their records during the  
363 study. Except when required by law, name, personal identification number (e.g., Sistema Único de Saúde  
364 [SUS] or health insurance card number, address, telephone number or any other direct personal identifier  
365 in the study records will not identify participants.

366

367 The participant's identity will remain confidential when the results of the study are published.

368

369

370 **References**

371 Chen, N., Zhou, M., Dong, X., Qu, J., Gong, F., Han, Y., . . . Wei, Y. (2020). Epidemiological and clinical  
372 characteristics of 99 cases of 2019 novel coronavirus pneumonia in Wuhan, China: a descriptive study.  
373 *The Lancet*, 395(10223), 507-513.

374  
375 Huang, C., Wang, Y., Li, X., Ren, L., Zhao, J., Hu, Y., . . . Cao, B. (2020). Clinical features of patients  
376 infected with 2019 novel coronavirus in Wuhan, China. *The Lancet*, 395(10223), 497-506.  
377 doi:10.1016/s0140-6736(20)30183-5

378  
379 Lippi, G., Lavie, C. J., & Sanchis-Gomar, F. (2020). Cardiac troponin I in patients with coronavirus  
380 disease 2019 (COVID-19): Evidence from a meta-analysis. *Progress in cardiovascular diseases*.

381  
382 Gheblawi M, Wang K, Viveiros A, Nguyen Q, Zhong JC, Turner AJ, Raizada MK, Grant MB, Oudit GY  
383 (2020). Angiotensin-Converting Enzyme 2: SARS-CoV-2 Receptor and Regulator of the Renin-  
384 Angiotensin System: Celebrating the 20th Anniversary of the Discovery of ACE2. *Circulation Res*  
385 126:1456-74.

386  
387 Soler MJ, Barrios C, Oliva R, Battle D. (2008). Pharmacologic modulation of ACE2 expression. *Curr*  
388 *Hypertens Rep* 10:410.

389  
390 Liu, J., Cao, R., Xu, M., Wang, X., Zhang, H., Hu, H., . . . Wang, M. (2020). Hydroxychloroquine, a less  
391 toxic derivative of chloroquine, is effective in inhibiting SARS-CoV-2 infection in vitro. *Cell Discovery*, 6(1).  
392 doi:10.1038/s41421-020-0156-0

393  
394 Patel AB, Verma A. COVID-19 and angiotensin-converting enzyme inhibitors and angiotensin receptor  
395 blockers: what is the evidence? *JAMA*. 2020;323:1769-1770.

396  
397 Ruan, Q., Yang, K., Wang, W., Jiang, L., & Song, J. (2020). Clinical predictors of mortality due to COVID-  
398 19 based on an analysis of data of 150 patients from Wuhan, China. *Intensive Care Medicine*, 1-3.

399  
400 Turner, A. J., Hiscox, J. A., & Hooper, N. M. (2004). ACE2: from vasopeptidase to SARS virus receptor.  
401 *Trends in pharmacological sciences*, 25(6), 291-294.

402 Wang, D., Hu, B., Hu, C., Zhu, F., Liu, X., Zhang, J., . . . Xiong, Y. (2020). Clinical characteristics of 138  
403 hospitalized patients with 2019 novel coronavirus–infected pneumonia in Wuhan, China. *Jama*.

404  
405 WHO. (2020). Coronavirus disease 2019 (COVID-19): situation report, 51.

406 Wu, Z., & McGoogan, J. M. (2020). Characteristics of and important lessons from the coronavirus disease  
407 2019 (COVID-19) outbreak in China: summary of a report of 72 314 cases from the Chinese Center for  
408 Disease Control and Prevention. *Jama*.

409

410 Zheng, Y.-Y., Ma, Y.-T., Zhang, J.-Y., & Xie, X. (2020). COVID-19 and the cardiovascular system. *Nature*  
411 *Reviews Cardiology*, 1-2.

412

413

414

415

416

417

418

419

420

421

422

423

424

425

426

427

428



429  
430  
431  
432 **Investigator: Dr Renato Delascio Lopes**  
433 **Protocol: “Suspension of angiotensin-converting enzyme inhibitors and angiotensin receptor blockers**  
434 **and adverse outcomes in hospitalized patients with severe acute respiratory syndrome coronavirus 2**  
435 **(SARS-CoV-2) – The BRACE CORONA Trial’**

436  
437 AMENDMENT 1 – APPROVED 04/14/2020  
438 JUSTIFICATION: Electronic or oral Informed Consent Form application  
439

440 AMENDMENT 2 – APPROVED 05/13/2020  
441 JUSTIFICATION:

- 442 • Inclusion of another hospital
  - 443 • Protocol alterations
- 444
- 445 1. Exclusion criteria: inclusion of sacubitril/valsartan use.
  - 446
  - 447 2. Secondary outcomes: Cardiovascular and non-cardiovascular outcomes, such as: progression of  
448 COVID-19, mortality (overall and cardiovascular), acute myocardial infarction, cerebrovascular  
449 accident (CVA)/transient ischemic attack (TIA), new heart failure (HF) or worsening of pre-  
450 existing HF, myocarditis, pericarditis, arrhythmias that require treatment, thromboembolic events,  
451 hypertensive crisis, respiratory insufficiency, hemodynamic decompensation, sepsis, renal failure,  
452 biomarkers levels (troponin, B-type natriuretic peptide [BNP], N-terminal pro B-type natriuretic  
453 peptide [NT-proBNP], D-dimer, total lymphocytes, CD4, CD8, macrophages, cytokines, in  
454 addition to proteomics and metabolomics diagnosed biomarkers). The clinical outcomes during  
455 30 days of follow-up (death, acute myocardial infarction, CVA, hypertensive crisis and heart  
456 failure) will be assessed and classified by an adjudication committee.
  - 457
  - 458 3. Data and Safety Monitoring Committee (DSMC): The study outcomes (which include efficacy and  
459 safety variables) and other serious adverse events not included as study outcomes will be  
460 reported and monitored continuously by an independent Data and Safety Monitoring  
461 Committee (DSMC). The DSMC will be managed by the BCRI and comprises independent  
462 investigators who will analyze the data in an unblinded, independent and systematic way with  
463 weekly meetings in order to offer greater security to the patients. In addition to the weekly regular  
464 analyses, 2 interim formal analyses will be performed (with 150 randomized patients and 250

465 randomized patients who have completed the study follow-up of 30 days). The DSMC will use a P  
466 value of <0.001 to determine a statistically significant difference of the outcomes between the  
467 groups in these interim analyses (in the final study analysis, a P value of <0.05 will be used to  
468 determine a statistically significant difference).

469  
470 4. Size of sample: In assuming a standard deviation of 4 days and an average time of 24 days alive  
471 and out of the hospital (based on the ongoing study COALIZAO I [NCT04322123]), the inclusion  
472 of 500 patients will have a 90% power to detect an average ratio of at least 1.10 on the primary  
473 outcome.

474

475 • Informed Consent Form (ICF) alterations

476 Inclusion of blood collection for cytokine and other biomarkers quantification.

477

478 AMENDMENT 3 – APPROVED 06/30/2020

479 JUSTIFICATION:

480 • Protocol alterations:

481

482 1. Increase of recruitment rate to about 700 patients instead of 500 initially expected patients and presented  
483 sample calculation.

484

485 2. Due to a lower than initially expected number of patients using ACEI in relation to the subgroup of  
486 patients using ARBs, we intend, after completion of the inclusion of patients in the main study, to  
487 continue with the randomization only of the ACEI patients subgroup until we reach an estimated sample  
488 of 250 patients. The aim is to achieve better statistical power within this group of ACEI and perform a pre-  
489 specified subgroup analysis.

490
