# Supplementary material
Source: PubMed Central journal article supplement (PMC7816106)
Supplement: jama-e2025864-s003.pdf [file jama-e2025864-s003.pdf]

### Online Supplement 3

1

2

3 This supplement contains the following items:

4

5

6 1. Final Statistical Analysis Plan

7

8 2. Summary of changes in the Statistical Analysis Plan

9

10

11  
12  
13  
14  
15  
16  
17  
18  
19  
20  
21  
22  
23  
24  
25  
26  
27  
28  
29  
30  
31  
32  
33

## **STATISTICAL ANALYSIS PLAN**

**Suspension of angiotensin-converting enzyme inhibitors and angiotensin receptor blockers and adverse outcomes in hospitalized patients with severe acute respiratory syndrome coronavirus 2 (SARS-CoV-2)  
The BRACE CORONA Trial**

## 34 Contents

|    |                                                                                               |    |
|----|-----------------------------------------------------------------------------------------------|----|
| 35 | Introduction.....                                                                             | 4  |
| 36 | Study objectives .....                                                                        | 4  |
| 37 | Inclusion Criteria                                                                            | 4  |
| 38 | Exclusion Criteria                                                                            | 4  |
| 39 | Primary outcome                                                                               | 4  |
| 40 | Secondary outcomes                                                                            | 5  |
| 41 | Calculation of the sample size                                                                | 5  |
| 42 | Interim analysis                                                                              | 6  |
| 43 | Basic principles of statistical analysis .....                                                | 6  |
| 44 | Analysis of the primary outcome                                                               | 6  |
| 45 | Analysis of secondary outcomes                                                                | 7  |
| 46 | Missing data                                                                                  | 7  |
| 47 | Graphical presentation of results                                                             | 7  |
| 48 | Graph 1. Mean days alive and out of the hospital for total number of days from randomization  |    |
| 49 | according to group .....                                                                      | 8  |
| 50 | Graph 2. Accumulated percentage of the number of days alive and out of the hospital according |    |
| 51 | to group.....                                                                                 | 9  |
| 52 | Graph 3. Percentage of number of days alive and out of the hospital according to the group    | 10 |
| 53 | Graph 4. Accumulated percentage of number of days alive and out of the hospital according to  |    |
| 54 | group .....                                                                                   | 11 |
| 55 | Graph 5. Comparison of number of days alive and out of the hospital for some outcomes         |    |
| 56 | according to group .....                                                                      | 12 |
| 57 | Subgroup analyses                                                                             | 13 |
| 58 | Sensitivity analysis                                                                          | 13 |
| 59 | Adverse events                                                                                | 13 |
| 60 | Table 1. Baseline characteristics of patients.....                                            | 15 |
| 61 | Table 2. Primary and secondary endpoints.....                                                 | 18 |
| 62 | Table 3. Subgroup analysis .....                                                              | 20 |
| 63 | References .....                                                                              | 22 |
| 64 |                                                                                               |    |

## 65 **Introduction**

66 The interaction of pre-existing therapies for chronic diseases, especially in cardiovascular diseases, with  
67 therapies used to treat coronavirus disease 2019 (COVID-19) raise doubts about the risks and benefits of  
68 maintaining or suspending certain drugs for chronic use. In this study, various indicators will be calculated  
69 to assess the risks and benefits of maintaining or suspending the use of angiotensin-converting enzyme  
70 (ACEI) inhibitors and angiotensin receptor blockers (ARBs).

71

## 72 **Study objectives**

73 The objective of the study is to evaluate the impact of the suspension of the use of ACEI and ARB  
74 therapy on the number of days alive and out of the hospital at 30 days in patients hospitalized with  
75 COVID-19.

76

## 77 **Inclusion Criteria**

- 78 • Hospitalized patients with confirmed COVID-19 diagnosis, using ACEI or ARBs;
- 79 • Age  $\geq 18$  years;
- 80 • Using no more than 3 antihypertensive drugs;
- 81 • Ability of patient (or legal representative) to provide informed consent.

## 82 **Exclusion Criteria**

83 The exclusion criteria will be the presence of at least one of the following items:

- 84 • Patients hospitalized for decompensated congestive heart failure in the last 12 months;
- 85 • Use of sacubitril/valsartan;
- 86 • Use of mechanical ventilation, and/or hemodynamic instability in the first 24 hours or until  
87 confirmation of COVID-19 diagnosis;
- 88 • Acute renal failure;
- 89 • Shock;
- 90 • Pregnancy.

## 91 **Primary outcome**

92 The primary outcome will be given by the number of days alive and out of the hospital. For each patient  
93 included, it will be calculated as the follow-up time (30 days or number of days between the date of  
94 randomization and the date of death) minus the days of hospitalization.

95

## 96 **Secondary outcomes**

97 Secondary outcomes are as follows:

- 98 1. Length of hospital stay, in days;
- 99 2. Mortality, in the follow-up period;
- 100 3. In-hospital mortality;
- 101 4. Cardiovascular mortality;
- 102 5. COVID-19 progression (worsening of severity during hospitalization in relation to baseline
- 103 severity);
- 104 6. Acute myocardial infarction;
- 105 7. Stroke/transient ischemic attack;
- 106 8. New heart failure or worsening of pre-existing heart failure;
- 107 9. Myocarditis;
- 108 10. Pericarditis;
- 109 11. Arrhythmias requiring treatment;
- 110 12. Thromboembolic phenomena;
- 111 13. Hypertensive crisis;
- 112 14. Respiratory failure requiring mechanical ventilation;
- 113 15. Hemodynamic decompensation with the need for vasoactive drugs;
- 114 16. Renal failure requiring replacement therapy (dialysis);
- 115 17. Troponin above upper limit of normal in patients with no change in baseline;
- 116 18. B-type natriuretic peptide (BNP) above upper limit of normal in patients with no change in
- 117 baseline;
- 118 19. D-dimer above upper limit of normal in patients with no change in baseline;

119

120 All secondary outcomes will be assessed within 30 days.

121

## 122 **Calculation of the sample size**

123 To date, there are no studies that allow an adequate sample calculation. Thus, the expected initial sample  
124 will be at least 500 patients. This number may increase or decrease depending on the recruitment and  
125 event rates, and the Data and Safety Monitoring Committee's (DSMC) interim review.

126

127 Using the measures of the ongoing study COALIZAO I [NCT04322123] as a reference (standard  
128 deviation of 4 days and average time of 24 days alive and outside the hospital), it will be possible to  
129 obtain a power of 90% to detect an average ratio of at least 1.10 in the primary endpoint with a total of  
130 500 patients.

131

132 The recruitment of participants occurred faster than expected and in order to be able to carry out the two  
133 interim analyzes with a 30-day follow-up of 150 and 250 patients, the recruitment was extended and  
134 ended with a number of patients above the initially calculated, which confirmed even greater statistical  
135 power for the study.

136

### 137 **Interim analysis**

138 In this study, 2 interim analyses were planned when 150 and 250 patients were enrolled. The DSMC used  
139 a P value of <0.001 to determine statistically significant differences (in the final analysis of the study a P  
140 value of 0.05 is considered statistically significant).

141

### 142 **Basic principles of statistical analysis**

143 In this study, the following population definitions will be used:

144

145 1. Intention to treat (ITT): all eligible patients who have been randomized according to the group to  
146 which they have been allocated, regardless of the maintenance or suspension of medications.

147

148 2. In treatment ("on treatment"): defined by the maintenance or suspension of medication, regardless  
149 of the allocated group.

150

151 We will carry out analyses of baseline variables and primary and secondary outcomes using the ITT  
152 population.

153

154 The baseline characteristics of the patients will be presented as described in Table 1. Statistical analyses  
155 will be performed using R software (R Core Team, Vienna, Austria, 2020).

156

### 157 **Analysis of the primary outcome**

158 The primary outcome of the study will be given as the number of days alive and out of the hospital. The  
159 comparison of the two groups (with and without suspension of ACEIs / ARBs) will be made based on the  
160 generalized additive model of location, scale, and shape with zero inflated beta binomial distribution. The  
161 results will be presented as the ratio of the average times between the groups with the respective 95%  
162 confidence interval, as shown in Table 2. The difference in means (95% confidence interval) of the  
163 primary outcome, as well as the median difference (25th, 75th) will also be calculated and presented.

## 164 **Analysis of secondary outcomes**

165 Secondary binary outcomes (such as mortality in the follow-up period, mortality in the hospital period,  
166 etc.) will be compared with the use of log-binomial models and relative risks will be reported with the  
167 respective 95% confidence intervals.

168  
169 For continuous secondary outcomes, generalized linear models will be used considering the distribution  
170 that best fits the data and the average differences between groups will be reported with the respective  
171 95% confidence intervals.

172  
173 The outcomes of time until cardiovascular events (alone or in combination) and mortality will be analyzed  
174 with Kaplan-Meier curves and proportional hazards model.

175  
176 The results of these outcomes will be presented as shown in Table 2.

177

## 178 **Missing data**

179 For patients with missing data within 30 days, the primary outcome will be analyzed with the outcome  
180 imputed based on stratification variables (previous use of ACEI or ARBs), age, time of discharge, and  
181 degree of disease severity at hospital admission. This imputation will be done using the Multivariate  
182 Imputation by Chained Equations in R package (van Buuren and Groothuis-Oudshoorn, 2011).

183 Secondary outcomes can be imputed using the same method.

184

## 185 **Graphical presentation of results**

186 Some results will be presented graphically. For example, the mean days alive and out of the hospital for  
187 each group can be presented according to **Graph 1**. The percentage of each status (living and out of the  
188 hospital at 30 days, hospitalized over the 30 days, and died within 30 days) according to the number of  
189 days from randomization will be presented according to **Graph 2**.

190

191 Other ways of presenting the results will be considered. The number of days alive and out of the hospital  
192 according to group can be presented with the percentage distribution (**Graph 3**) or as the accumulated  
193 percentage (**Graph 4**). The comparison of groups in relation to the number of days alive and out of the  
194 hospital according to some characteristics or outcomes can be presented in the format of **Graph 5**.

195

196 These formats can be changed in a more convenient way that will be defined after observing the 30-day  
197 follow-up data.

198 **Graph 1. Mean days alive and out of the hospital for total number of days from**  
199 **randomization according to group**

200

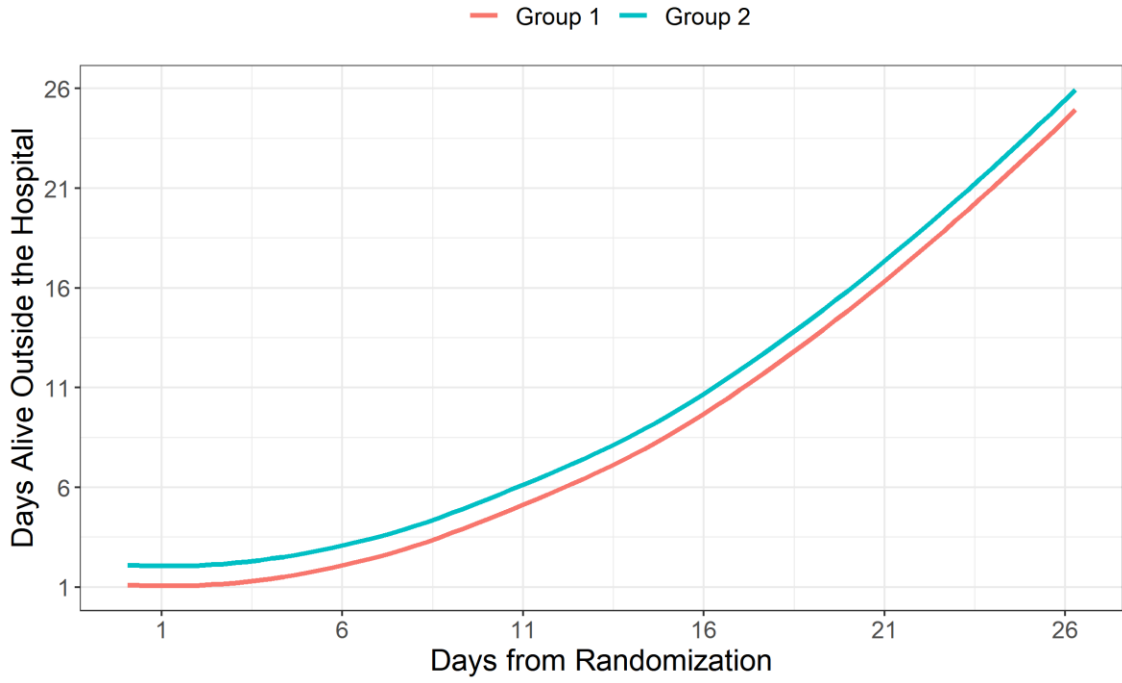

201  
202  
203  
204  
205  
206  
207  
208  
209  
210  
211



212 **Graph 2. Accumulated percentage of the number of days alive and out of the**  
213 **hospital according to group**

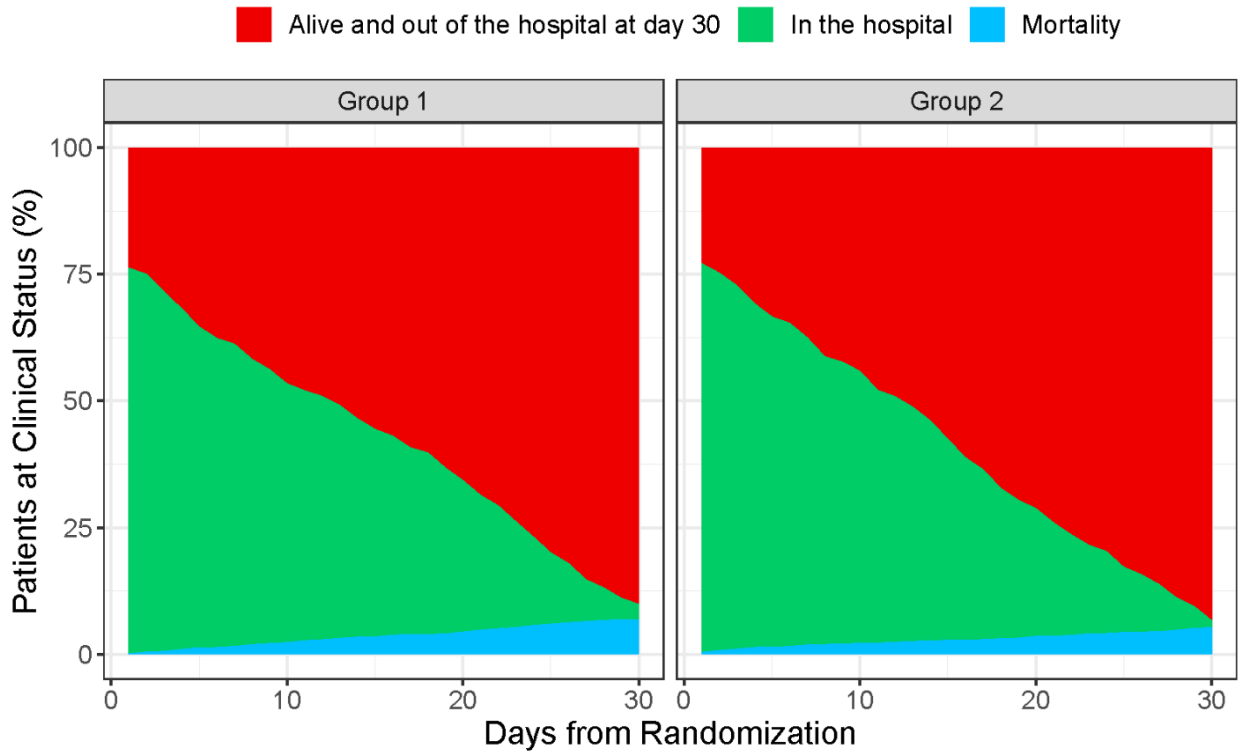

214  
215  
216

217 **Graph 3. Percentage of number of days alive and out of the hospital according to**  
218 **the group**

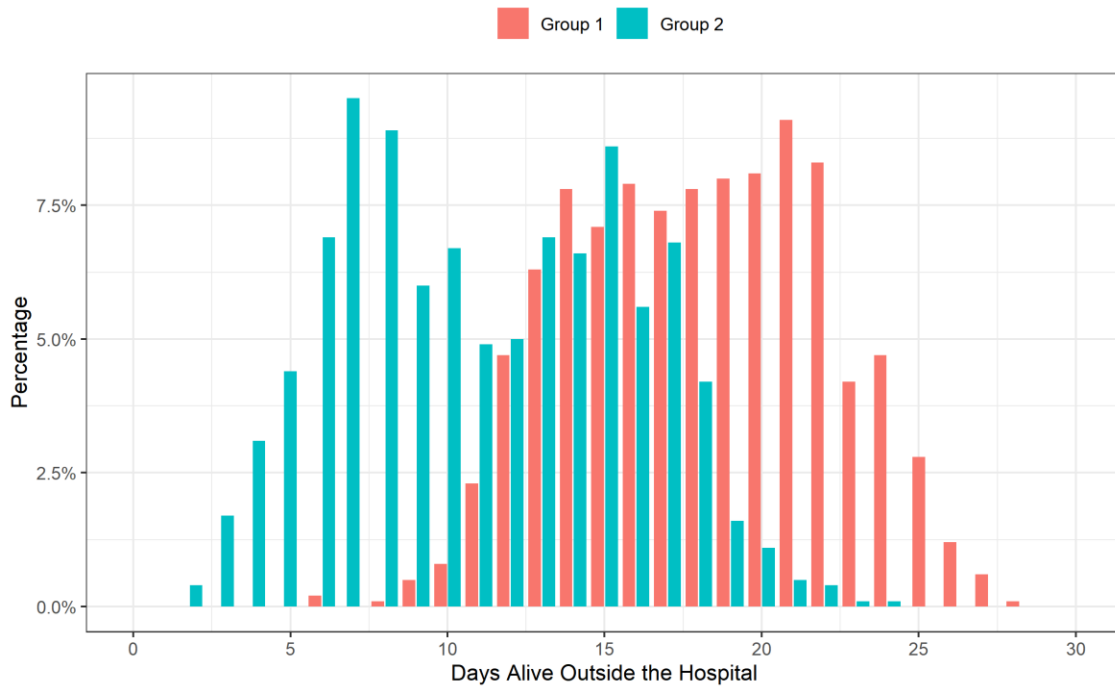

219  
220  
221  
222

223 **Graph 4. Accumulated percentage of number of days alive and out of the hospital**  
224 **according to group**

225

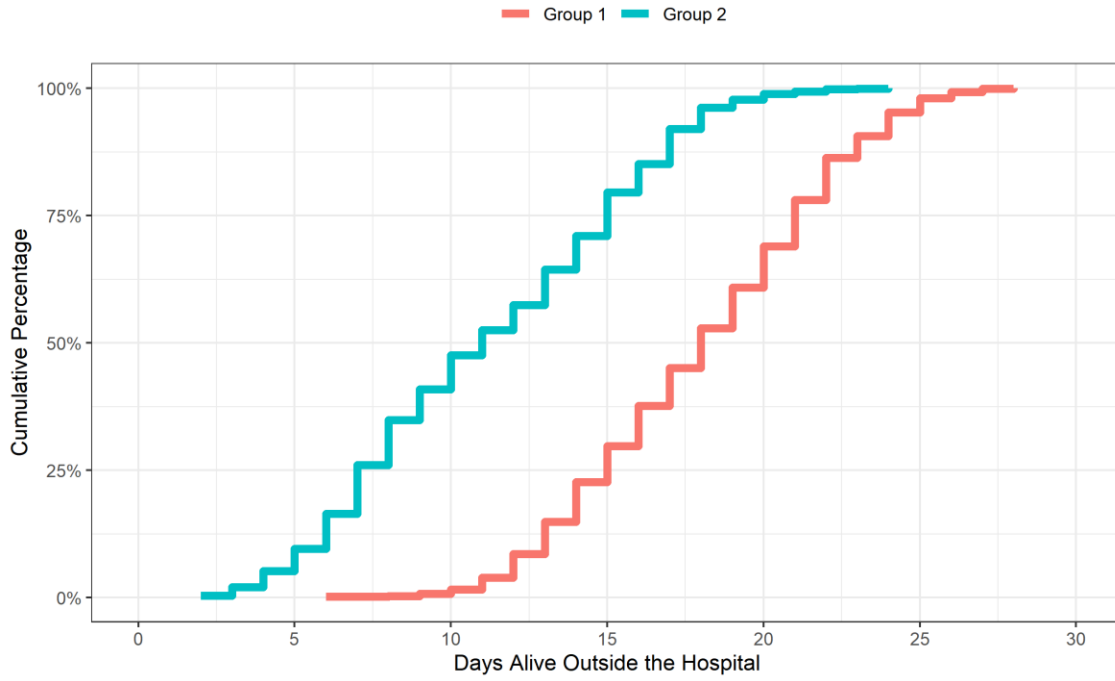

226  
227  
228

229 **Graph 5. Comparison of number of days alive and out of the hospital for some**  
230 **outcomes according to group**

231

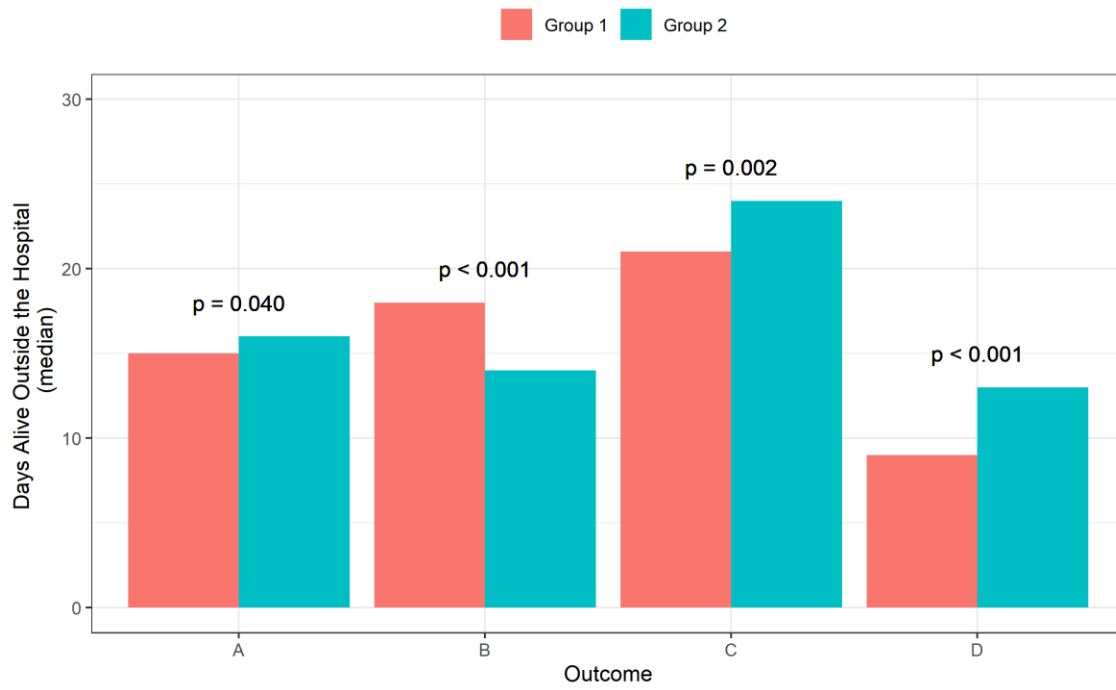

232

233

## 234 **Subgroup analyses**

235 The subgroup analyses will be done with the inclusion of parameters of interaction with the groups (with  
236 and without suspension of the ACEI / ARB) in the generalized additive model of location, scale, and  
237 shape with beta binomial distribution inflated at zero for the main outcome for the variables listed below:  
238

- 239 1. Age (<65 years or ≥65 years);
- 240 2. Obesity (yes vs no);
- 241 3. Previous use of ACEI (yes vs no);
- 242 4. Previous use of ARB (yes vs no);
- 243 5. O2 saturation (<94% AA vs ≥94% AA);
- 244 6. Time from symptom onset to randomization (first tertile, second tertile, and third tertile);
- 245 7. Degree of lung involvement assessed by chest computed tomography at hospital admission (≤ 25%,  
246 26-50%; ≥ 51%);
- 247 8. Severity of COVID-19 disease (mild, moderate and severe).

248

249 The results of the subgroup analyses will be presented in a forest plot graph with data similar to those  
250 presented in Table 3.

251

## 252 **Sensitivity analysis**

253 As the main analysis will done with multiple data imputation, we intend to perform a sensitivity analysis  
254 considering only the complete data for the primary outcome.

255

256 A sensitivity analysis will be performed in which the value of 0 days will be given as the number of days  
257 alive and out of the hospital for the cases in which the patient dies, regardless of the date of death. This  
258 will ensure that these cases are not considered positive measures for the study. In addition, the analysis  
259 of the primary outcome with a mixed model will be conducted using the centers as a random effect.

260

## 261 **Adverse events**

262 Serious adverse events will be defined by at least one of the following criteria, which are not already  
263 classified as a secondary outcome of the study:

264

- 265 1. Fatal (AE that causes or leads to death);
- 266 2. Risk to life (puts the patient at imminent risk of death);
- 267 3. Requires or extends hospitalization;

268 4. Results in deficiency/incapacity;

269 5. Significant medical event that may require clinical or surgical intervention to prevent one of the  
270 outcomes listed above.

271

272 These events will be reported for each group and compared using the Chi-square test.

273

274

275 **Table 1. Baseline characteristics of patients**

|                                   | Discontinuing<br>ACEI/ARB<br>(n =) | Continuing<br>ACEI/ARB<br>(n =) | Total<br>(n =) |
|-----------------------------------|------------------------------------|---------------------------------|----------------|
|                                   | xx.x ± xx.x                        | xx.x ± xx.x                     | xx.x ± xx.x    |
| Age, mean±SD, years               | xx.x (xx.x)                        | xx.x (xx.x)                     | xx.x (xx.x)    |
| Women, no. (%)                    | xx.x ± xx.x                        | xx.x ± xx.x                     | xx.x ± xx.x    |
| BMI, mean ± SD, kg/m <sup>2</sup> |                                    |                                 |                |
| Medical history, no. (%)          | xx.x (xx.x)                        | xx.x (xx.x)                     | xx.x (xx.x)    |
| Hypertension                      | xx.x (xx.x)                        | xx.x (xx.x)                     | xx.x (xx.x)    |
| Asthma                            | xx.x (xx.x)                        | xx.x (xx.x)                     | xx.x (xx.x)    |
| Kidney disease                    | xx.x (xx.x)                        | xx.x (xx.x)                     | xx.x (xx.x)    |
| History of cancer                 | xx.x (xx.x)                        | xx.x (xx.x)                     | xx.x (xx.x)    |
| Obesity                           | xx.x (xx.x)                        | xx.x (xx.x)                     | xx.x (xx.x)    |
| Diabetes                          |                                    |                                 |                |
| Smoking                           | xx.x (xx.x)                        | xx.x (xx.x)                     | xx.x (xx.x)    |
| Active smoker                     | xx.x (xx.x)                        | xx.x (xx.x)                     | xx.x (xx.x)    |
| Former smoker                     | xx.x (xx.x)                        | xx.x (xx.x)                     | xx.x (xx.x)    |
| Never smoked                      | xx.x (xx.x)                        | xx.x (xx.x)                     | xx.x (xx.x)    |
| Heart failure                     | xx.x (xx.x)                        | xx.x (xx.x)                     | xx.x (xx.x)    |
| Coronary heart disease            | xx.x (xx.x)                        | xx.x (xx.x)                     | xx.x (xx.x)    |
| Arrhythmias                       |                                    |                                 |                |
| Medication on admission, no. (%)  | xx.x (xx.x)                        | xx.x (xx.x)                     | xx.x (xx.x)    |
| ARB                               | xx.x (xx.x)                        | xx.x (xx.x)                     | xx.x (xx.x)    |
| ACEI                              | xx.x (xx.x)                        | xx.x (xx.x)                     | xx.x (xx.x)    |
| Beta-blockers                     | xx.x (xx.x)                        | xx.x (xx.x)                     | xx.x (xx.x)    |
| Calcium-channel blockers          | xx.x (xx.x)                        | xx.x (xx.x)                     | xx.x (xx.x)    |
| Diuretics                         | xx.x (xx.x)                        | xx.x (xx.x)                     | xx.x (xx.x)    |
| Oral anticoagulants (yes)         | xx.x (xx.x)                        | xx.x (xx.x)                     | xx.x (xx.x)    |

|                                                                               | <b>Discontinuing<br/>ACEI/ARB<br/>(n =)</b> | <b>Continuing<br/>ACEI/ARB<br/>(n =)</b> | <b>Total<br/>(n =)</b> |
|-------------------------------------------------------------------------------|---------------------------------------------|------------------------------------------|------------------------|
| Antiplatelet drug (yes)                                                       | xx.x (xx.x)                                 | xx.x (xx.x)                              | xx.x (xx.x)            |
| Insulin (yes)                                                                 | xx.x (xx.x)                                 | xx.x (xx.x)                              | xx.x (xx.x)            |
| Statin (yes)                                                                  | xx.x [xx.x; xx.x]                           | xx.x [xx.x; xx.x]                        | xx.x [xx.x; xx.x]      |
| Duration of ACEI/ ARB use prior to randomization,<br>median (25th, 75th), yrs |                                             |                                          |                        |
| Laboratory on admission                                                       |                                             |                                          |                        |
| Troponin above normal, no. (%)                                                | xx.x (xx.x)                                 | xx.x (xx.x)                              | xx.x (xx.x)            |
| D-dimer above normal, no. (%)                                                 | xx.x (xx.x)                                 | xx.x (xx.x)                              | xx.x (xx.x)            |
| D-dimer above normal, no. (%)                                                 | xx.x ± xx.x                                 | xx.x ± xx.x                              | xx.x ± xx.x            |
| Lymphocytes, mean±SD, cell/mm <sup>3</sup>                                    | xx.x ± xx.x                                 | xx.x ± xx.x                              | xx.x ± xx.x            |
| Leukocytes, mean±SD, cells/mm <sup>3</sup>                                    | xx.x ± xx.x                                 | xx.x ± xx.x                              | xx.x ± xx.x            |
| Serum creatinine, mean±SD, mg/dl                                              | xx.x ± xx.x                                 | xx.x ± xx.x                              | xx.x ± xx.x            |
| C-reactive protein, mean±SD, mg/dl                                            | xx.x ± xx.x                                 | xx.x ± xx.x                              | xx.x ± xx.x            |
| Potassium, mean±SD                                                            | xx.x ± xx.x                                 | xx.x ± xx.x                              | xx.x ± xx.x            |
| Sodium, mean±SD                                                               |                                             |                                          |                        |
| Clinical severity on first 24 hours, no. (%)                                  |                                             |                                          |                        |
| Mild                                                                          | xx.x (xx.x)                                 | xx.x (xx.x)                              | xx.x (xx.x)            |
| Moderate                                                                      | xx.x (xx.x)                                 | xx.x (xx.x)                              | xx.x (xx.x)            |
| Severe                                                                        | xx.x (xx.x)                                 | xx.x (xx.x)                              | xx.x (xx.x)            |
| Degree of lung involvement on chest CT on<br>hospital admission, no. (%)      |                                             |                                          |                        |
| ≤25%,                                                                         | xx.x (xx.x)                                 | xx.x (xx.x)                              | xx.x (xx.x)            |
| 25 to 50%                                                                     | xx.x (xx.x)                                 | xx.x (xx.x)                              | xx.x (xx.x)            |
| >50%                                                                          | xx.x (xx.x)                                 | xx.x (xx.x)                              | xx.x (xx.x)            |
| Clinical characteristics on admission                                         |                                             |                                          |                        |
| Systolic blood pressure, mm Hg, mean±SD                                       | xx.x (xx.x)                                 | xx.x (xx.x)                              | xx.x (xx.x)            |
| Diastolic blood pressure, mm Hg, mean±SD                                      | xx.x ± xx.x                                 | xx.x ± xx.x                              | xx.x ± xx.x            |



|                                                                                               | <b>Discontinuing<br/>ACEI/ARB<br/>(n =)</b> | <b>Continuing<br/>ACEI/ARB<br/>(n =)</b> | <b>Total<br/>(n =)</b> |
|-----------------------------------------------------------------------------------------------|---------------------------------------------|------------------------------------------|------------------------|
| Heart rate, bpm, mean±SD                                                                      | xx.x ± xx.x                                 | xx.x ± xx.x                              | xx.x ± xx.x            |
| Respiratory frequency, bpm, mean±SD                                                           | xx.x ± xx.x                                 | xx.x ± xx.x                              | xx.x ± xx.x            |
| SaO <sub>2</sub> , %, mean±SD                                                                 | xx.x ± xx.x                                 | xx.x ± xx.x                              | xx.x ± xx.x            |
| SaO <sub>2</sub> <94 % RA, no. (%)                                                            | xx.x ± xx.x                                 | xx.x ± xx.x                              | xx.x ± xx.x            |
| Cough, no. (%)                                                                                | xx.x (xx.x)                                 | xx.x (xx.x)                              | xx.x (xx.x)            |
| Dyspnea, no. (%)                                                                              | xx.x (xx.x)                                 | xx.x (xx.x)                              | xx.x (xx.x)            |
| Fever, no. (%)                                                                                | xx.x (xx.x)                                 | xx.x (xx.x)                              | xx.x (xx.x)            |
| Temperature (°C), mean±SD                                                                     | xx.x (xx.x)                                 | xx.x (xx.x)                              | xx.x (xx.x)            |
| Time from the beginning of the first symptom to<br>hospitalization, median (25th, 75th), days | xx.x ± xx.x                                 | xx.x ± xx.x                              | xx.x ± xx.x            |
| Time from the start of the first symptom to<br>randomization, median (25th, 75th), days       |                                             |                                          |                        |
| Time between hospitalization and randomization,<br>median (25th, 75th), days                  | xx.x [xx.x; xx.x]                           | xx.x [xx.x; xx.x]                        | xx.x [xx.x; xx.x]      |
| Treatment during hospitalization, no. (%)                                                     | xx.x [xx.x; xx.x]                           | xx.x [xx.x; xx.x]                        | xx.x [xx.x; xx.x]      |
| Chloroquine/hydroxychloroquine                                                                | xx.x [xx.x; xx.x]                           | xx.x [xx.x; xx.x]                        | xx.x [xx.x; xx.x]      |
| Azithromycin                                                                                  |                                             |                                          |                        |
| Any antibiotics                                                                               | xx.x (xx.x)                                 | xx.x (xx.x)                              | xx.x (xx.x)            |
| Corticosteroids                                                                               | xx.x (xx.x)                                 | xx.x (xx.x)                              | xx.x (xx.x)            |
| Antiviral drugs                                                                               | xx.x (xx.x)                                 | xx.x (xx.x)                              | xx.x (xx.x)            |
| Tocilizumab                                                                                   | xx.x (xx.x)                                 | xx.x (xx.x)                              | xx.x (xx.x)            |
| Therapeutic anticoagulation                                                                   | xx.x (xx.x)                                 | xx.x (xx.x)                              | xx.x (xx.x)            |

276 ACEI denotes angiotensin-converting enzyme inhibitor; ARB, angiotensin receptor blocker; BMI, body mass index;  
277 CT, computed tomography; SD, standard deviation; SaO<sub>2</sub>, oxygen saturation.

278 **Table 2. Primary and secondary endpoints**

|                                                      | Discontinuing<br>ACEI/ARB<br>(n =) | Continuing<br>ACEI/ARB<br>(n =) | Effect Type   | Effect size<br>(95% CI) | P value |
|------------------------------------------------------|------------------------------------|---------------------------------|---------------|-------------------------|---------|
| <b>Primary Outcome</b>                               |                                    |                                 |               |                         |         |
| Days alive and out of hospital, mean±SD              | x.xx [x.xx - x.xx]                 | x.xx [x.xx - x.xx]              | Mean Ratio    | xx.x (xx.x – xx.x)      | x.xx    |
| <b>Secondary outcomes</b>                            |                                    |                                 |               |                         |         |
| Length of hospitalization, median (25th, 75th), days | xx.x ± xx.x                        | xx.x ± xx.x                     | Mean Ratio    | xx.x (xx.x – xx.x)      | x.xx    |
| Length of hospitalization, mean ± SD, days           | xx.x (xx.x)                        | xx.x (xx.x)                     | Mean Ratio    | xx.x (xx.x – xx.x)      | x.xx    |
| Mortality at 30 days, no. (%)                        | xx.x (xx.x)                        | xx.x (xx.x)                     | Hazard Ratio  | xx.x (xx.x – xx.x)      | x.xx    |
| In-hospital mortality, no. (%)                       | xx.x (xx.x)                        | xx.x (xx.x)                     | Hazard Ratio  | xx.x (xx.x – xx.x)      | x.xx    |
| Cardiovascular mortality, no. (%)                    | xx.x (xx.x)                        | xx.x (xx.x)                     | Hazard Ratio  | xx.x (xx.x – xx.x)      | x.xx    |
| Progression of COVID-19 disease, no. (%)             | xx.x (xx.x)                        | xx.x (xx.x)                     | Relative Risk | xx.x (xx.x – xx.x)      | x.xx    |
| Acute MI, no. (%)                                    | xx.x (xx.x)                        | xx.x (xx.x)                     | Relative Risk | xx.x (xx.x – xx.x)      | x.xx    |
| Type II acute MI/Myocardial injury, no. (%)          | xx.x (xx.x)                        | xx.x (xx.x)                     | Relative Risk | xx.x (xx.x – xx.x)      | x.xx    |
| Stroke/TIA, no. (%)                                  | xx.x (xx.x)                        | xx.x (xx.x)                     | Relative Risk | xx.x (xx.x – xx.x)      | x.xx    |
| New or worsening heart failure, no. (%)              | xx.x (xx.x)                        | xx.x (xx.x)                     | Relative Risk | xx.x (xx.x – xx.x)      | x.xx    |
| Myocarditis, no. (%)                                 | xx.x (xx.x)                        | xx.x (xx.x)                     | Relative Risk | xx.x (xx.x – xx.x)      | x.xx    |

|                                                                        | <b>Discontinuing<br/>ACEI/ARB<br/>(n =)</b> | <b>Continuing<br/>ACEI/ARB<br/>(n =)</b> | <b>Effect Type</b> | <b>Effect size<br/>(95% CI)</b> | <b>P value</b> |
|------------------------------------------------------------------------|---------------------------------------------|------------------------------------------|--------------------|---------------------------------|----------------|
| Pericarditis, no. (%)                                                  | xx.x (xx.x)                                 | xx.x (xx.x)                              | Relative risk      | xx.x (xx.x – xx.x)              | x.xx           |
| Arrhythmias requiring treatment, no. (%)                               | xx.x (xx.x)                                 | xx.x (xx.x)                              | Relative risk      | xx.x (xx.x – xx.x)              | x.xx           |
| Thromboembolic events, no. (%)                                         | xx.x (xx.x)                                 | xx.x (xx.x)                              | Relative risk      | xx.x (xx.x – xx.x)              | x.xx           |
| Hypertensive crisis, no. (%)                                           | xx.x (xx.x)                                 | xx.x (xx.x)                              | Relative risk      | xx.x (xx.x – xx.x)              | x.xx           |
| Respiratory failure requiring invasive mechanical ventilation, no. (%) | xx.x (xx.x)                                 | xx.x (xx.x)                              | Relative risk      | xx.x (xx.x – xx.x)              | x.xx           |
| Hemodynamic decompensation requiring vasoactive drugs, no. (%)         | xx.x (xx.x)                                 | xx.x (xx.x)                              | Relative risk      | xx.x (xx.x – xx.x)              | x.xx           |
| Acute renal failure requiring renal replacement therapy, no. (%)       | xx.x (xx.x)                                 | xx.x (xx.x)                              | Relative risk      | xx.x (xx.x – xx.x)              | x.xx           |
| Troponin above the ULN, no. (%)                                        | xx.x (xx.x)                                 | xx.x (xx.x)                              | Relative risk      | xx.x (xx.x – xx.x)              | x.xx           |

279  
280

ACEI denotes angiotensin-converting enzyme inhibitors; ARB, angiotensin receptor blocker; COVID-19, coronavirus disease 2019; MI, myocardial infarction; SD, standard deviation; TIA, transient ischemic attack; ULN, upper limit of normal.

281 **Table 3. Subgroup analysis**

|                                                                          | Discontinuing<br>ACEI/ARB<br>(n = ) | Continuing<br>ACEI/ARB<br>(n = ) | Effect Size<br>(95% CI) | P value | P value<br>(interaction) |
|--------------------------------------------------------------------------|-------------------------------------|----------------------------------|-------------------------|---------|--------------------------|
| Age, mean±SD                                                             |                                     |                                  |                         |         |                          |
| <65 years                                                                | xx.x ± xx.x                         | xx.x ± xx.x                      | xx.x (xx.x – xx.x)      | x.xx    | x.xx                     |
| ≥65 years                                                                | xx.x ± xx.x                         | xx.x ± xx.x                      | xx.x (xx.x – xx.x)      | x.xx    |                          |
| Obesity, mean±SD                                                         |                                     |                                  |                         |         |                          |
| Yes                                                                      | xx.x ± xx.x                         | xx.x ± xx.x                      | xx.x (xx.x – xx.x)      | x.xx    | x.xx                     |
| No                                                                       | xx.x ± xx.x                         | xx.x ± xx.x                      | xx.x (xx.x – xx.x)      | x.xx    |                          |
| Previous use of ACEI,<br>mean±SD                                         |                                     |                                  |                         |         |                          |
| Yes                                                                      | xx.x ± xx.x                         | xx.x ± xx.x                      | xx.x (xx.x – xx.x)      | x.xx    | x.xx                     |
| No                                                                       | xx.x ± xx.x                         | xx.x ± xx.x                      | xx.x (xx.x – xx.x)      | x.xx    |                          |
| Previous use of ARBs,<br>mean±SD                                         |                                     |                                  |                         |         |                          |
| Yes                                                                      | xx.x ± xx.x                         | xx.x ± xx.x                      | xx.x (xx.x – xx.x)      | x.xx    | x.xx                     |
| No                                                                       | xx.x ± xx.x                         | xx.x ± xx.x                      | xx.x (xx.x – xx.x)      | x.xx    |                          |
| Saturation O <sub>2</sub> , mean±SD                                      |                                     |                                  |                         |         |                          |
| <94 %RA                                                                  | xx.x ± xx.x                         | xx.x ± xx.x                      | xx.x (xx.x – xx.x)      | x.xx    | x.xx                     |
| ≥94 %RA                                                                  | xx.x ± xx.x                         | xx.x ± xx.x                      | xx.x (xx.x – xx.x)      | x.xx    |                          |
| Time from the start of the<br>first symptom to<br>randomization, mean±SD |                                     |                                  |                         |         |                          |
| First tertile (up to 5<br>days)                                          | xx.x ± xx.x                         | xx.x ± xx.x                      | xx.x (xx.x – xx.x)      | x.xx    | x.xx                     |
| Second tertile (5 to 8<br>days)                                          | xx.x ± xx.x                         | xx.x ± xx.x                      | xx.x (xx.x – xx.x)      | x.xx    |                          |
| Third tertile (more than<br>8 days)                                      | xx.x ± xx.x                         | xx.x ± xx.x                      | xx.x (xx.x – xx.x)      | x.xx    |                          |

Chest CT staging on  
admission, mean±SD

|        |             |             |                    |      |      |
|--------|-------------|-------------|--------------------|------|------|
| ≤25%   | xx.x ± xx.x | xx.x ± xx.x | xx.x (xx.x – xx.x) | x.xx | x.xx |
| 26–50% | xx.x ± xx.x | xx.x ± xx.x | xx.x (xx.x – xx.x) | x.xx |      |
| >51%   | xx.x ± xx.x | xx.x ± xx.x |                    |      |      |

Clinical severity on  
admission, mean±SD

|          |             |             |                    |      |      |
|----------|-------------|-------------|--------------------|------|------|
| Mild     | xx.x (xx.x) | xx.x (xx.x) | xx.x (xx.x – xx.x) | x.xx | x.xx |
| Moderate | xx.x (xx.x) | xx.x (xx.x) | xx.x (xx.x – xx.x) | x.xx |      |
| Severe   | xx.x (xx.x) | xx.x (xx.x) | xx.x (xx.x – xx.x) | x.xx |      |

---

282 ACEI denotes angiotensin-converting enzyme inhibitors; ARB, angiotenin receptor blocker; CT, computed  
283 tomography; SD, standard deviation.  
284  
285  
286  
287  
288  
289  
290

291 **References**

292 R Core Team (2020). R: A language and environment for statistical computing. R Foundation  
293 for Statistical Computing, Vienna, Austria. URL <https://www.R-project.org/>.

294

295 van Buuren S, Groothuis-Oudshoorn K (2011). “mice: Multivariate Imputation by Chained  
296 Equations in R.” Journal of Statistical Software, 45(3), 1-67. <https://www.jstatsoft.org/v45/i03/>.

297

298

299

300

301

302

303

304

305

306

307

308

309

310

311

312

313

314

315

316

317

318

319

320

321 **STATISTICAL ANALYSIS PLAN (SAP)**  
322 **CHANGES IN 1.0 VERSION (05/30/2020) of the SAP TO 2.0 VERSION (07/31/2020) of the**  
323 **SAP**

324

325 1. Creation of a section about sensitivity analyses in which the analysis mentioned in  
326 version 1.0: “Will be performed as well a sensitivity analysis in which the value of 0 days  
327 will be given as the number of days alive and out of the hospital for the cases in which  
328 the patient dies, regardless of the date of death. This will ensure that these cases are  
329 not considered positive measures for the study.”\* was included with other sensitivity  
330 analyses\*\*.

331 \* This was removed from the primary outcomes section in version 1.0 and placed in the  
332 sensitivity analyses section of version 2.0.

333 \*\*The following sensitivity analyses were included: analysis considering only the complete data  
334 for the primary outcome; analysis of the primary outcome with a mixed model considering the  
335 sites as a random effect.

336

337 2. Expanded descriptions of some secondary outcomes:

338

339 - The description of “Respiratory insufficiency” (version 1.0) became “Respiratory  
340 insufficiency with need for mechanical ventilation” in version 2.0.

341 - The description of “Hemodynamic decompensation and sepsis” (version 1.0) became  
342 “Hemodynamic decompensation with need for vasoactive drug” in version 2.0.

343 - The description of “Renal failure” (version 1.0) became “Renal failure with need for  
344 replacement therapy (dialysis)” in version 2.0.

345 - The description of “Troponin” (version 1.0) became “Troponin above the upper limit of  
346 normal in patients with normal values at baseline” in version 2.0.

347 - The description of “B-type natriuretic peptide (BNP)” (version 1.0) became “B-type  
348 natriuretic peptide (BNP) above the upper limit of normal in patients with normal levels  
349 at baseline” in version 2.0.

350 - The description of “D-dimer” (version 1.0) became “D-dimer above the upper limit of  
351 normal in patients with normal value at baseline” in version 2.0.

352

353 1. Explanation about the increase in sample size:

354 A paragraph explaining the rationale for the increase in sample size was added (The  
355 recruitment of participants occurred faster than expected and in order to be able to carry  
356 out the two interim analyzes with a 30-day follow-up of 150 and 250 patients, the  
357 recruitment was extended and the sample size increased to approximately 700  
358 patients.).

359

360 2. Addition to the section of the analysis of secondary outcomes:

361 The following information was included: The time, cardiovascular events (isolated or  
362 combined) and mortality outcomes can be analyzed with Kaplan-Meier curves and a  
363 proportional hazards model.

364

365 3. Addition of section about missing data and graphic presentation of the results:

366 Two new sections which were not in the initial version were included.

367 4. Changes in section about subgroup analysis:

368 As the number of cases of patients with previous CVA was small (<1%), it would not  
369 make sense to perform a subgroup analysis so this item was not included in version  
370 2.0.

371

372 The same rationale was applied to the patients with previous acute myocardial  
373 infarction; the rate was also low so this was not included in version 2.0. Other  
374 subgroups that were common and/or important to the prognostic information of COVID-  
375 19 were included (such as obesity, baseline O<sub>2</sub> saturation, time from symptom onset to  
376 randomization, degree of lung involvement assessed by chest computed tomography at  
377 hospital admission, and severity of COVID-19 disease) for subgroup analysis in version  
378 2.0:

379

- 380 1. Age (< 65 years or ≥65 years);
- 381 2. Obesity (yes vs no);
- 382 3. Previous use of ACEI (yes vs no);
- 383 4. Previous use of ARB (yes vs no);
- 384 5. O<sub>2</sub> saturation (< 94% AA vs ≥94% AA);
- 385 6. Time from symptom onset to randomization (divided in tertiles);
- 386 7. Degree of lung involvement assessed by chest computed tomography at hospital  
387 admission (≤25%, 26-50%; ≥51%);
- 388 8. Severity of COVID-19 disease (mild or moderate).

389

390 5. Changes in Table 1 and 2:

391 Changes were made to some labels and variables in Tables 1 and 2.

392

393

394

395
