# Supplementary material
Source: PubMed Central journal article supplement (PMC7816106)
Supplement: jama-e2025864-s004.pdf [file jama-e2025864-s004.pdf]

## **Data Sharing Statement**

Lopes. Effect of Discontinuing vs Continuing Angiotensin-Converting Enzyme Inhibitors and Angiotensin II Receptor Blockers on Days Alive and Out of the Hospital in Patients Admitted With COVID-19. *JAMA*. Published January 19, 2021. doi:10.1001/jama.2020.25864

### **Data**

**Data available:** No
